# Supplementary material
Source: publisher site journal article supplement (https://www.spandidos-publications.com/1435/downloadSupplementary)

Figure S1. Effects of different treatment time (24, 48 or 72 h) on the cytotoxicity of DpdtC in esophageal cancer cells. KYSE-150 and KYSE-450 cells were treated with 10  $\mu$ M DpdtC for the indicated time points. Cell Counting Kit-8 assays were used to measure the cell viability. All samples were tested in triplicate. Data are presented as the mean  $\pm$  SD. \* $P$ <0.05, \*\* $P$ <0.01. DpdtC, Dipyridylhydrazone dithiocarbamate; OD, optical density.

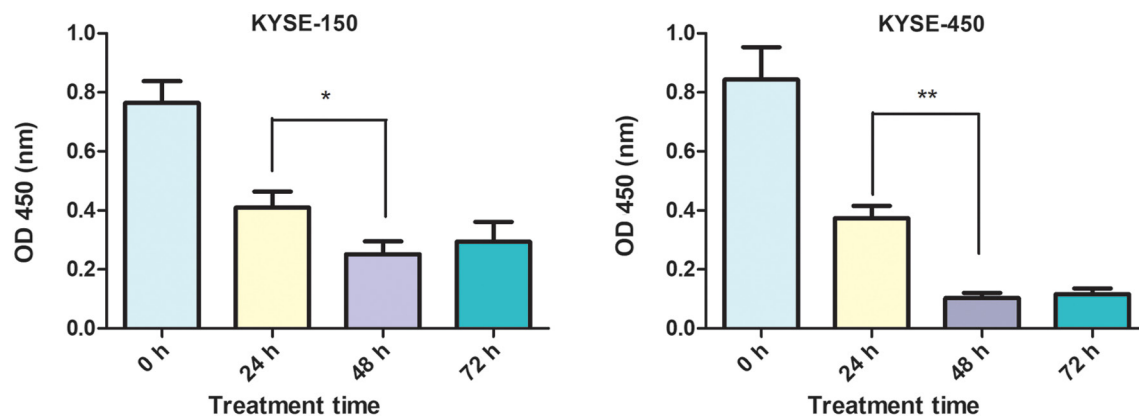

Figure S2. Effects of control, and 1 or 3 mg/kg DpdtC on the body weight of tumor-bearing mice were determined using KYSE-450 xenografts in nude mice. Mice were randomly divided into 3 groups of five mice each and treated with control (PBS) or DpdtC (1 or 3 mg/kg) four times from day 0. Then these mice were weighed at regular intervals during the whole period. Data are presented as the mean  $\pm$  SD. DpdtC, Dipyritylhydrazone dithiocarbamate.

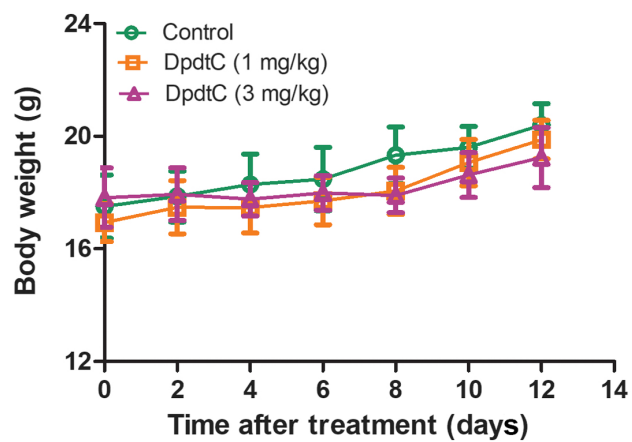

Supplement: Supplementary file 1 [file downloadSupplementary]
